# Supplementary material for: Comparative analysis of SRTM, TanDEM-X and UAV-SfM DEMs to estimate lavaka (gully) volumes and mobilization rates in the Lake Alaotra region (Madagascar)
Source: Copernicus journal article supplement (doi:10.5194/esurf-2021-64), 2021-08-24
Supplement: Supplementary file [file esurf-2021-64-AC2-supplement.pdf]

Dear Prof. Dr. Armaury Frankl,

We are very grateful for the constructive and detailed feedback that you provided on our manuscript. We would therefore like to thank you for investing your time and sharing your insights with us. While a more in-depth response and the updated manuscript will be provided upon receiving the decision of the editor, we would already like to address your primary concerns briefly.

We do agree that a more detailed discussion on possible methodological caveats and uncertainties is needed as this is a technical paper. This concern was also raised by Purinton (reply 2021) and Cox (reply 2021). We will therefore add the necessary information and details on these matters in a dedicated discussion section. We furthermore agree that from a theoretical point of view we could already assess which pixel size and corresponding DEM would be fine enough to study these landforms, we will also add this to the manuscript upfront in the introduction and further discuss this afterwards.

We will further address the more detailed comments in the revision of the manuscript.

Sincerely,

Liesa Brosens on behalf of the co-authors

## References

Cox (reply 2021). CC1: Comment on esurf-2021-64 by Rónadh Cox, 19 Oct 2021.  
<https://doi.org/10.5194/esurf-2021-64-CC1>

Purinton (reply 2021) RC1: Comment on esurf-2021-64 by Benjamin Purinton, 30 Aug 2021.  
<https://doi.org/10.5194/esurf-2021-64-RC1>
